# Supplementary material
Source: publisher site journal article supplement (https://www.dovepress.com/article/297865)
Supplement: Supplementary file 1 [file get_supplementary_file.php]

**Supplementary Table Search terms Review Dementia Enlightened?!**

| **Group 1 Persons with dementia** |
| --- |
| (dementia OR “Alzheimer’s disease” OR “Alzheimer disease” OR Alzheimer OR Alzheimers) AND |
| **Group 2 Light and lighting** |
| (illumination OR lighting OR light OR phototherapy OR “photo therapy” OR “correlated colour temperature” OR “correlated color temperature” OR daylight OR daylighting OR illuminance OR sunlight OR darkness OR dusk OR “color temperature” OR “colour temperature” OR dawn OR luminaires OR luminaire OR color OR colour OR “luminescent measurements” OR “luminescent measurement”) AND |
| **Group 3 Long-term care facilities** |
| (“residential facilities” OR “residential facility” OR “residential care institutions” OR “residential care institution” OR “nursing homes” OR “nursing home” OR “residential care” OR “long term care” OR “inpatient care” OR “care units” OR “care unit” OR institutionalized OR “institutional care” OR “senior homes” OR “senior home” OR “senior housing” OR “assisted living” OR “care homes” OR “care home” OR “dementia care” OR “psychogeriatric wards” OR “psychogeriatric ward” OR psychogeriatrics OR “psychogeriatric units” OR “psychogeriatric unit” OR “psychogeriatric departments” OR “psychogeriatric department” OR “living rooms” OR “living room”) |
